# Supplementary material for: Solvent extraction of lanthanides and yttrium from aqueous solution with methylimidazole in an ionic liquid
Source: Royal Society of Chemistry journal article supplement (doi:10.1039/c4dt00747f), 2014-01-01
Supplement: c4dt00747f1.pdf [file c4dt00747f1.pdf]

### Supporting information

Figure 1 The photo of the solid in the IL phase after extraction.

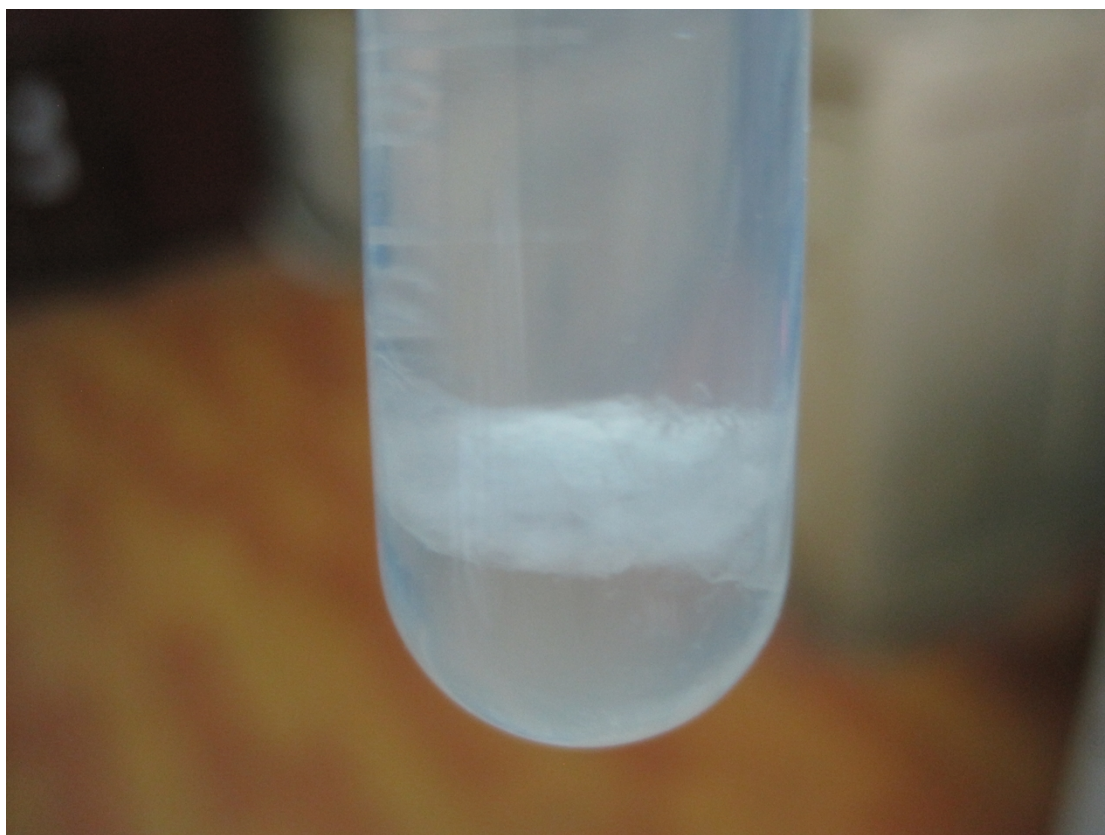

Figure 2 The ESI spectrum of the solid isolated from the [C<sub>4</sub>mim][NTf<sub>2</sub>] after extraction Lu<sup>3+</sup> by washing the IL with ethyl acetate.

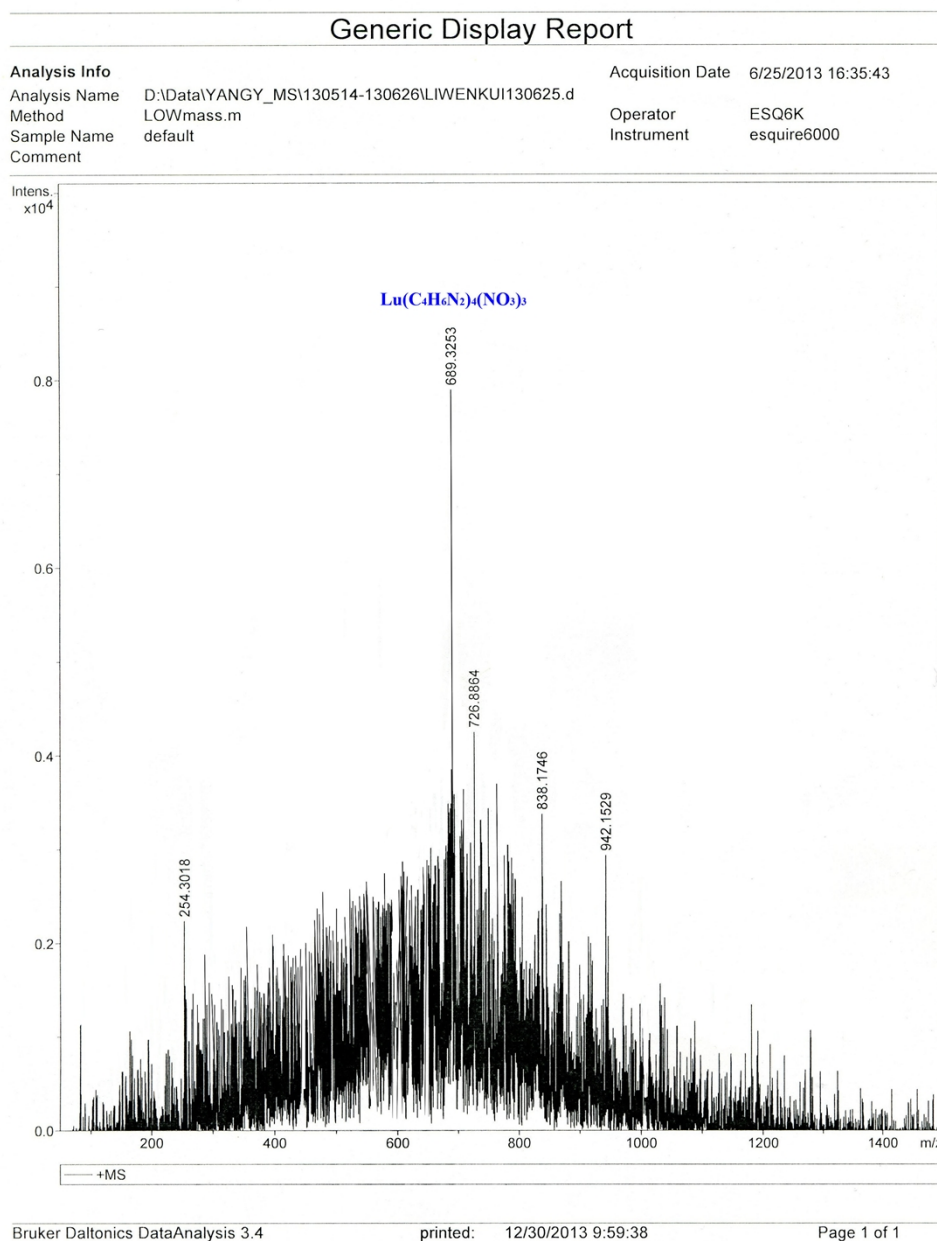

The peak at m/z 689.3253 can be found and it corresponds to the Lu(C<sub>4</sub>H<sub>6</sub>N<sub>2</sub>)<sub>4</sub>(NO<sub>3</sub>)<sub>3</sub> (calcd. 689.3533).

Figure 3 The ESI spectrum of the solid isolated from the [C<sub>4</sub>mim][NTf<sub>2</sub>] after extraction La<sup>3+</sup> by washing the IL with ethyl acetate.

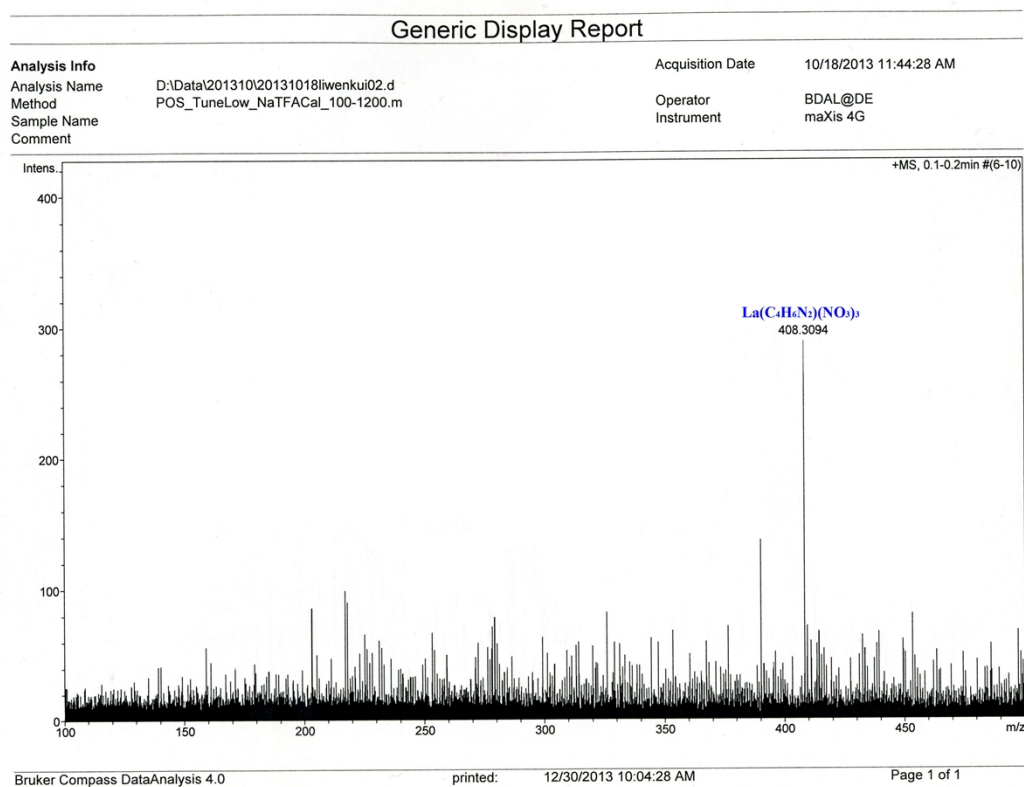

The peak at m/z 408.3094 can be found and it corresponds to the La(C<sub>4</sub>H<sub>6</sub>N<sub>2</sub>)(NO<sub>3</sub>)<sub>3</sub> . (calcd. 407.0054).

Figure 4 The ESI spectrum of the loaded  $[C_4mim][NTf_2]$  phase after extraction of  $Lu^{3+}$  in methanol.

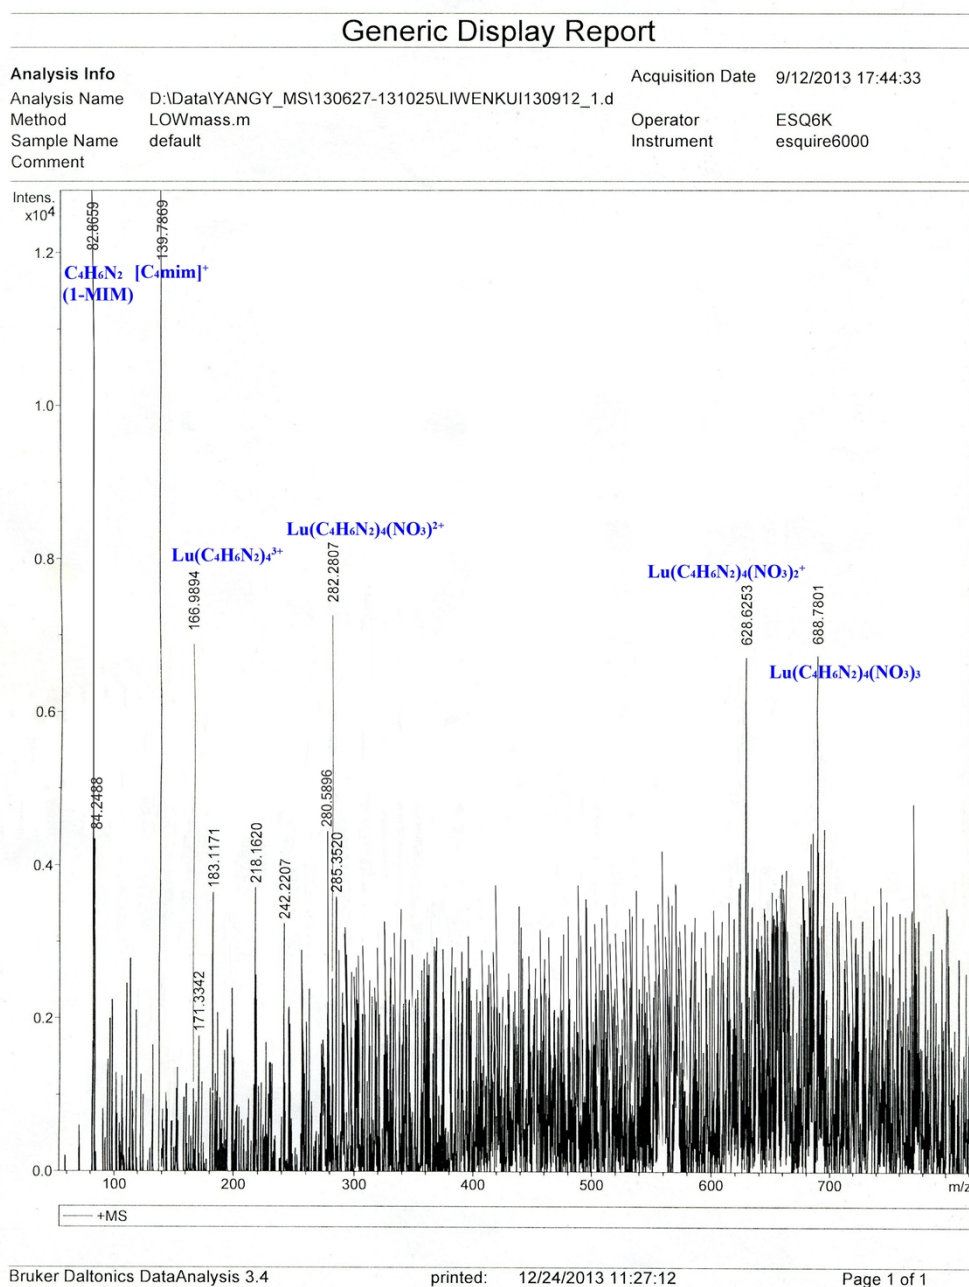

The peaks at  $m/z$  82.8659, 139.7869 can be found and they correspond to the 1-MIM( $C_4H_6N_2$ , calcd. 82.0978),  $C_4mim^+$  (calcd. 139.2121).

The peaks at  $m/z$  688.7801, 628.6253, 282.2807, 166.9894 can be found and they correspond to the complex of  $Lu(C_4H_6N_2)_4(NO_3)_3$ ,  $Lu(C_4H_6N_2)_4(NO_3)_2^+$ ,  $Lu(C_4H_6N_2)_4(NO_3)_2^{2+}$  and  $Lu(C_4H_6N_2)_4^{3+}$ .

Figure 5 The ESI spectrum of the loaded  $[C_4mim][NTf_2]$  phase after extraction of  $La^{3+}$  in methanol.

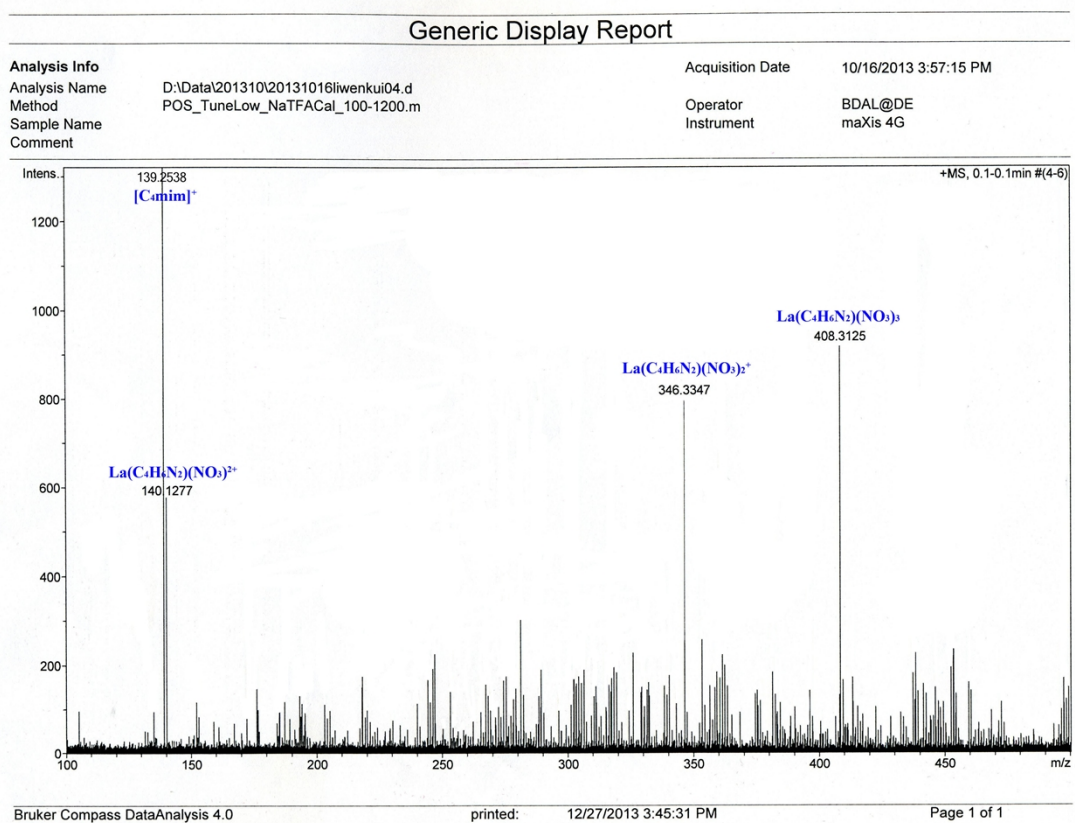

The peak at  $m/z$  139.2538 can be found and it corresponds to the  $C_4mim^+$  (calcd. 139.2121).

The peaks at  $m/z$  408.3125, 346.3347, 140.1227 can be found and they correspond to the complex of  $La(C_4H_6N_2)(NO_3)_3$ ,  $La(C_4H_6N_2)(NO_3)_2^+$  and  $La(C_4H_6N_2)(NO_3)^{2+}$ .



Figure 6 The ESI spectrum of the loaded *n*-pentanol phase after extraction of Lu<sup>3+</sup>.

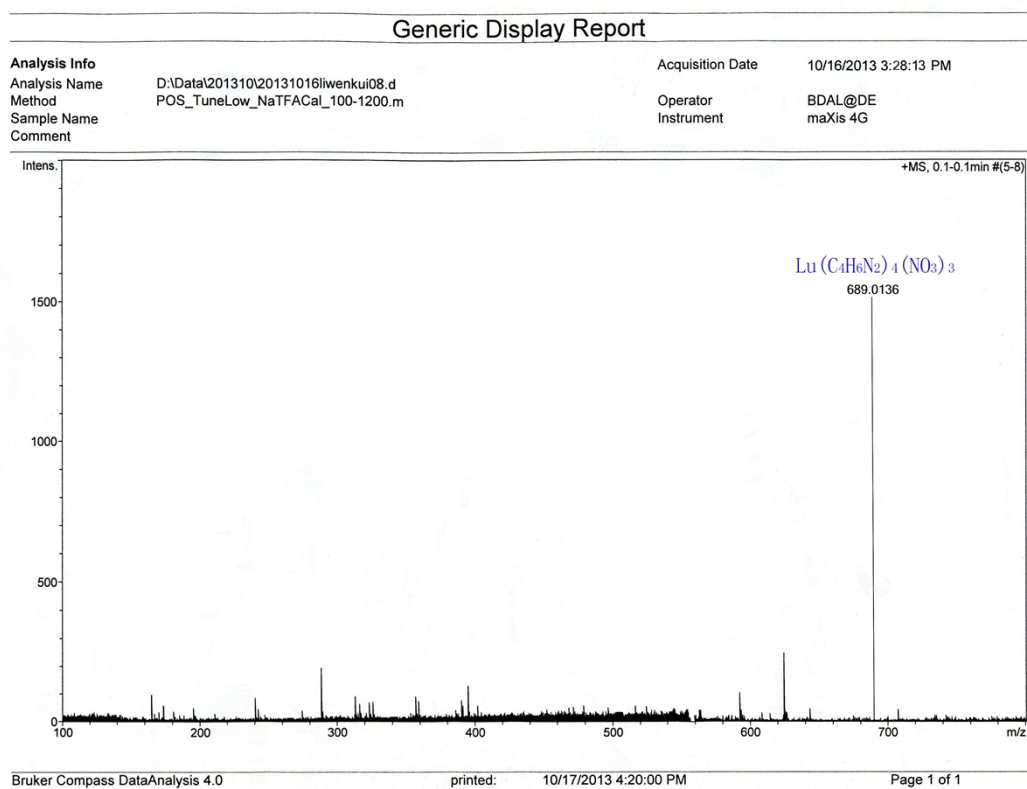

The peak at  $m/z$  689.0136 can be found and it corresponds to the  $\text{Lu}(\text{C}_4\text{H}_6\text{N}_2)_4(\text{NO}_3)_3$  (calcd. 689.3533).

Figure 7 The ESI spectrum of the loaded *n*-pentanol phase after extraction of  $\text{La}^{3+}$ .

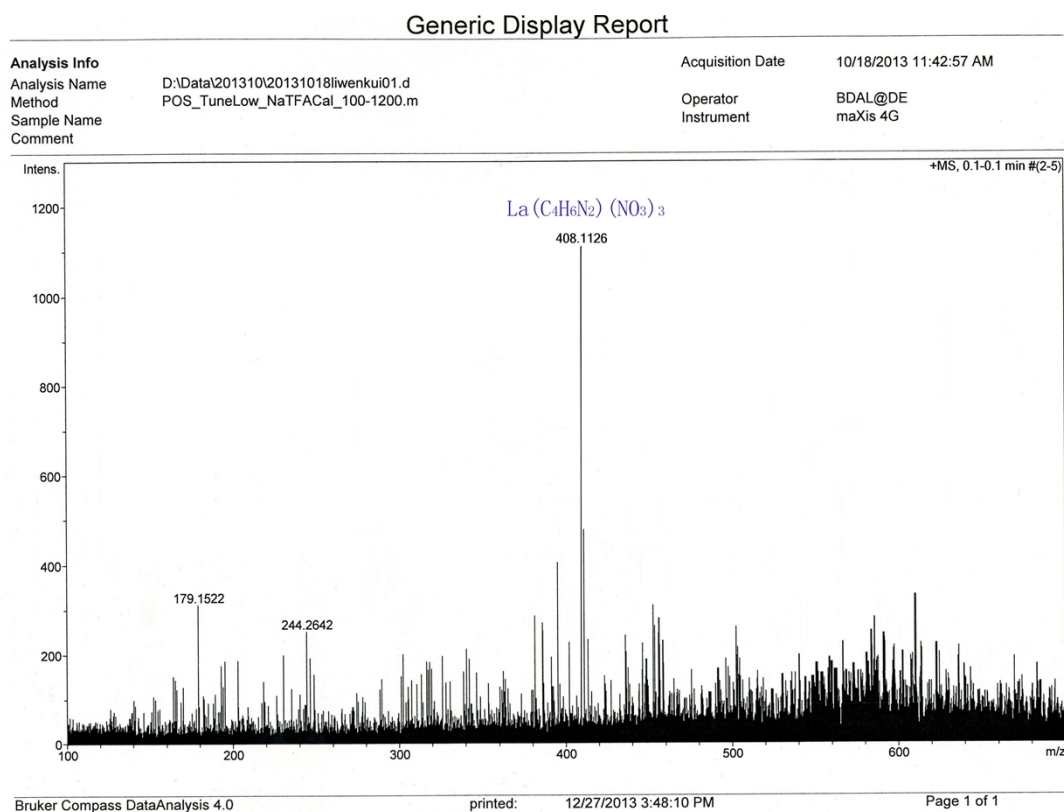

The peak at  $m/z$  408.1126 can be found and it corresponds to the  $\text{La}(\text{C}_4\text{H}_6\text{N}_2)(\text{NO}_3)_3$  (calcd. 407.0054).
